# Supplementary material
Source: PubMed Central journal article supplement (PMC3463269)
Supplement: cr2012106x4.pdf [file cr2012106x4.pdf]

Supplementary information, Figure S3

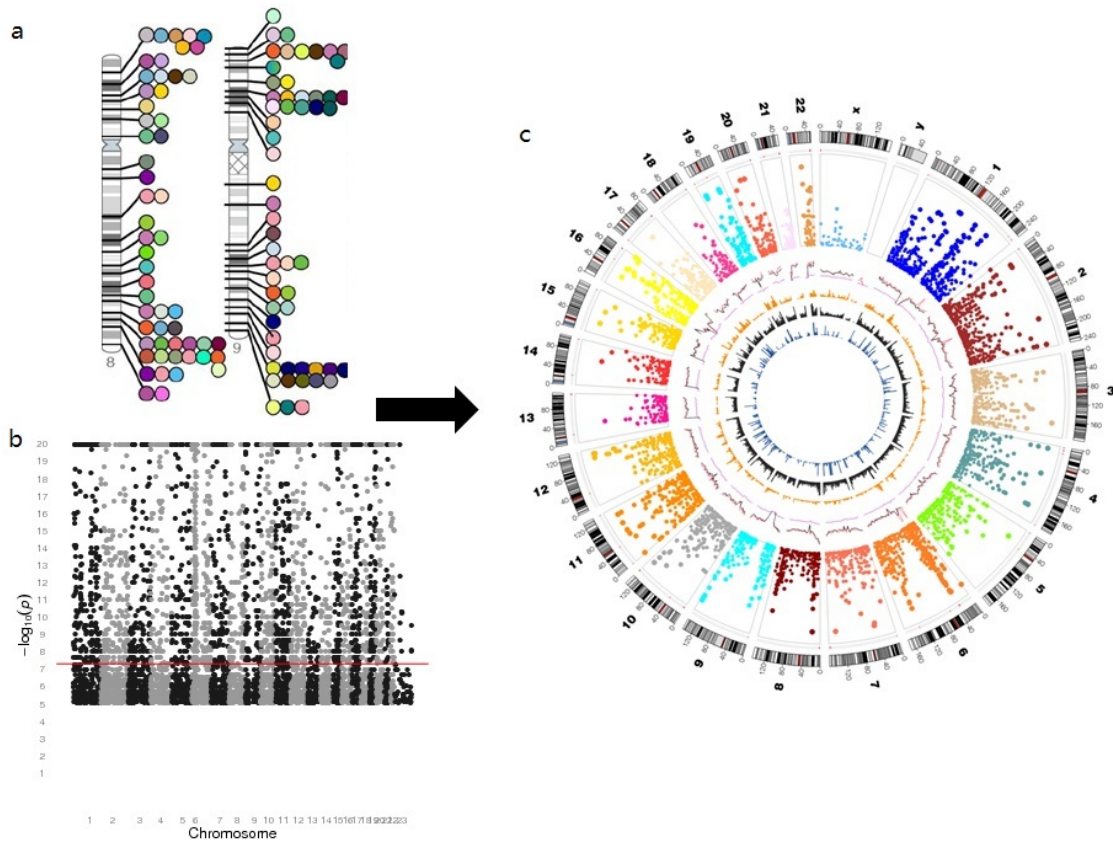

**Figure S3.** Different styles of GWAS representations: (a) The plotting style used in GWAS catalog. (b) The classic Manhattan plot. (c) The Circos-style GWAS representation.
