# Supplementary material
Source: PubMed Central journal article supplement (PMC3463269)
Supplement: cr2012106x7.pdf [file cr2012106x7.pdf]

Supplementary information, Figure S6

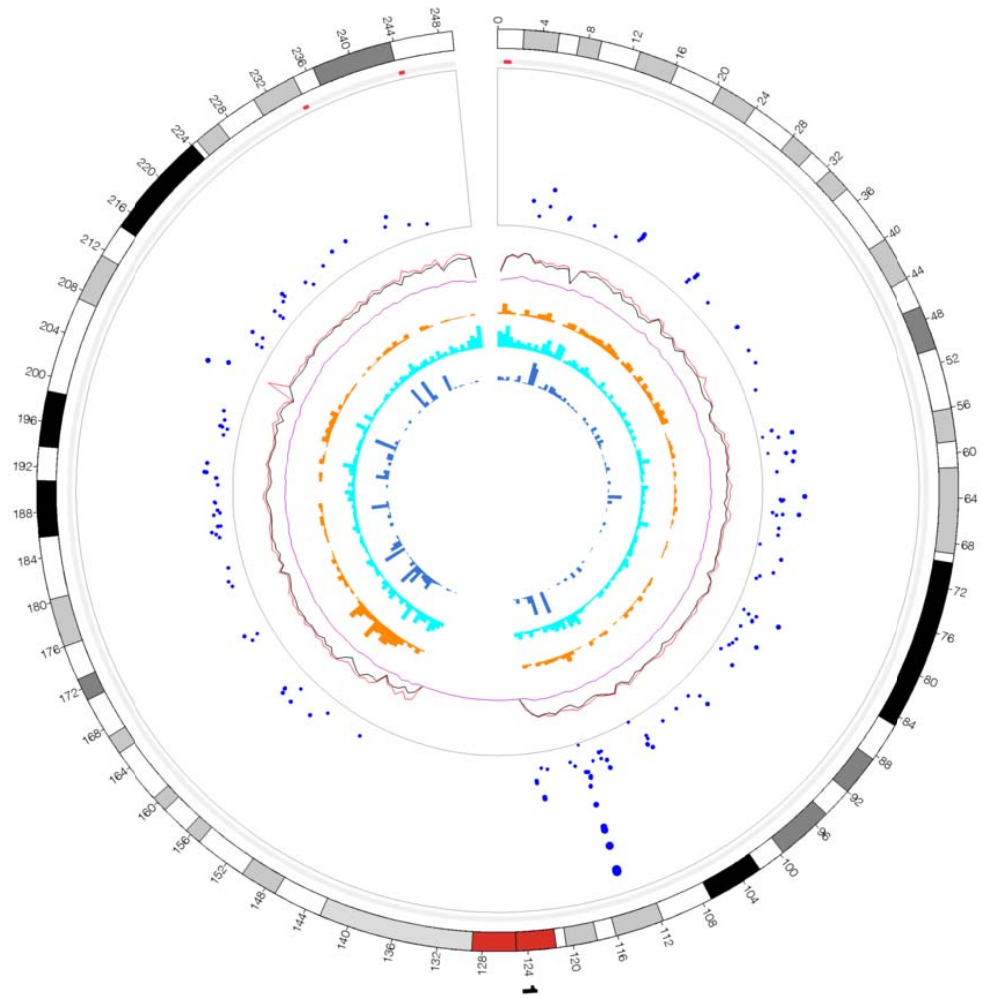

**Figure S6.** The GWAS representation of chromosome 1 for Diabetes Mellitus.
