# Supplementary material
Source: PubMed Central journal article supplement (PMC3463269)
Supplement: cr2012106x11.pdf [file cr2012106x11.pdf]

## Supplementary information, Figure S10

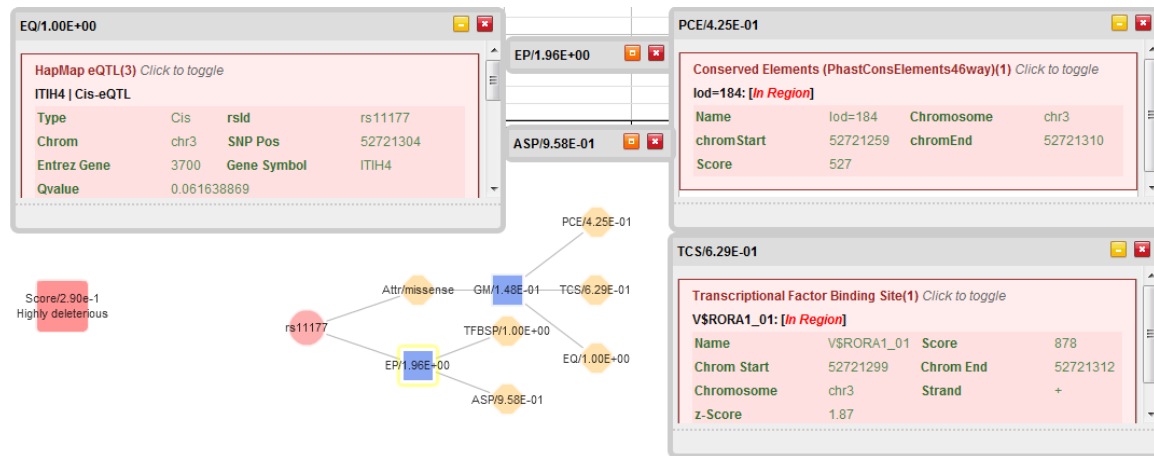

**Figure S10.** A prioritization tree depicts the deleteriousness of the selected variants. SNP deleteriousness was evaluated by our prioritization method. The prioritization score (*PS*) and estimated type (neutral, moderate and deleterious) were reported. The prioritization components are displayed in a tree-like view. The detailed information can be checked by clicking each node in the tree.
