# Supplementary material
Source: PubMed Central journal article supplement (PMC3463269)
Supplement: cr2012106x15.pdf [file cr2012106x15.pdf]

Supplementary information, Figure S14

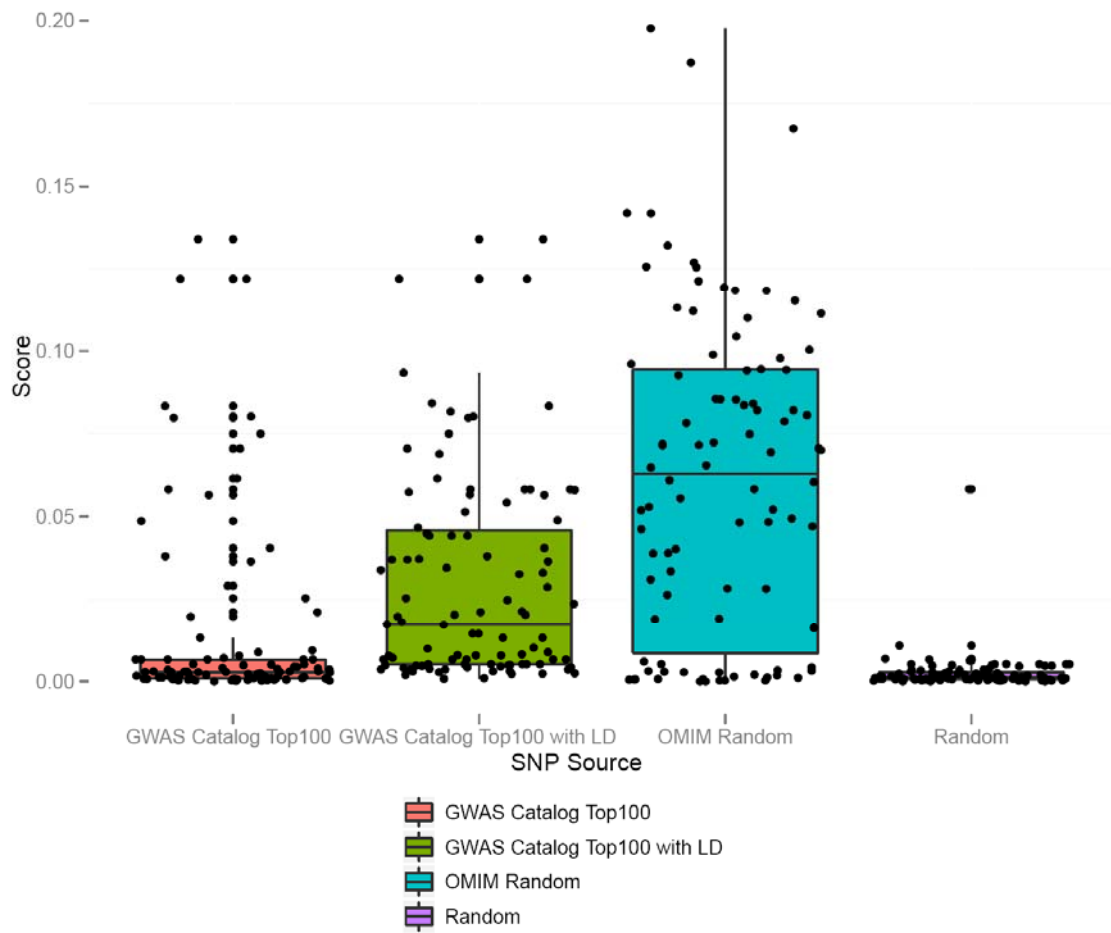

**Figure S14.** The boxplots of prioritization scores for GWAS top 100 TASs, with and without synthetic associations, OMIM random SNPs and randomly selected SNPs.
