# Supplementary material
Source: PubMed Central journal article supplement (PMC3463269)
Supplement: cr2012106x19.pdf [file cr2012106x19.pdf]

**Supplementary information, Table S3.** Information for the top 10 prioritized SNPs from the bipolar disorder GWAS.

| SNP ID           | Chr      | Pos             | Type              | Original P-value | PS             | FW              | Original Rank | Final Rank |
|------------------|----------|-----------------|-------------------|------------------|----------------|-----------------|---------------|------------|
| rs2251219        | 3        | 52584787        | cds-synon         | 2.00E-09         | 0.02823        | 7.05E-11        | 2             | 1          |
| rs11789399       | 9        | 121359286       | intergenic        | 5.56E-09         | 0.00521        | 1.06E-09        | 3             | 2          |
| rs1064395        | 19       | 19361735        | UTR-3             | 2.00E-09         | 0.00161        | 1.24E-09        | 1             | 3          |
| rs10994336       | 10       | 62179812        | intron            | 9.00E-09         | 0.00661        | 1.36E-09        | 4             | 4          |
| <b>rs1042779</b> | <b>3</b> | <b>52821011</b> | <b>missense</b>   | <b>2.00E-07</b>  | <b>0.12645</b> | <b>1.58E-09</b> | <b>34</b>     | <b>5</b>   |
| <b>rs300774</b>  | <b>2</b> | <b>112496</b>   | <b>intergenic</b> | <b>5.00E-08</b>  | <b>0.00521</b> | <b>9.57E-09</b> | <b>10</b>     | <b>6</b>   |
| rs4497258        | 1        | 56317834        | intergenic        | 6.50E-08         | 0.00521        | 1.24E-08        | 14            | 7          |
| rs2007044        | 12       | 2344960         | intron            | 5.20E-08         | 0.00406        | 1.27E-08        | 11            | 8          |
| rs7297582        | 12       | 2355806         | intron            | 3.40E-08         | 0.00191        | 1.77E-08        | 8             | 9          |
| rs10774036       | 12       | 2386948         | intron            | 1.20E-07         | 0.00661        | 1.81E-08        | 27            | 10         |
